# Supplementary material for: The Evolution and Functional Roles of miR408 and Its Targets in Plants
Source: MDPI journal article supplement (doi:10.3390/ijms23010530), 2022-01-04
Supplement: s1 [file s1]

**Table S5 Experimental validated of predicted miR408 targets in plants**

| Species                     | Sequences                                                                                                                                                                                                         | References |
|-----------------------------|-------------------------------------------------------------------------------------------------------------------------------------------------------------------------------------------------------------------|------------|
| <i>Arabidopsis thaliana</i> | <div> <div>2/12</div> <div> <div>5'-CCAAGGGAAGAGGCAGUGCAU-3'</div> <div> <div>0 0             00</div> <div>3'-CGGUCCC UUCUCC GUCACGGU-5'</div> </div> </div> <div>plantacyanin</div> <div>miR408</div> </div>    | [36]       |
|                             | <div> <div>9/12</div> <div> <div>5'-ACCAGUGAAGAGGCUGUGCAG-3'</div> <div> <div>0    0         0    0</div> <div>3'-CGGUCCC UUCUCCGUCACGUA-5'</div> </div> </div> <div>LAC3</div> <div>miR408</div> </div>          |            |
|                             | <div> <div>4/4</div> <div> <div>5'-GCCGGUGAAGAGGCUGUGCAA-3'</div> <div> <div>    0 0         0    0</div> <div>3'-CGGUCCCUUC UCCGUCACGUA-5'</div> </div> </div> <div>LAC12</div> <div>miR408</div> </div>         |            |
|                             | <div> <div>1/12 6/12</div> <div> <div>5'-CGCCGGUGAAGAGGCUGUGCAG-3'</div> <div> <div>    0 0         0    0</div> <div>3'-CGGUCCCUUCU CCGUCACGUA-5'</div> </div> </div> <div>LAC13</div> <div>miR408</div> </div>  |            |
|                             | <div> <div>1/8 5/8</div> <div> <div>5'-GCCGGUGAAGAGGCUGUGCAA-3'</div> <div> <div>    0 0         0    0</div> <div>3'-CGGUCCCUUC UCCGUCACGUA-5'</div> </div> </div> <div>LAC12</div> <div>miR408</div> </div>     | [37]       |
|                             | <div> <div>1/11 6/11</div> <div> <div>5'-GCC GGUGAAGAGGCUGUGCAG-3'</div> <div> <div>    0 0         0    0</div> <div>3'-CGGUCC CUUCUCCGUCAC GUA-5'</div> </div> </div> <div>LAC13</div> <div>miR408</div> </div> | [21, 37]   |
|                             | <div> <div>8/10 2/10</div> <div> <div>5'-CCAAGGGAAGAGGCAGUGCAU-3'</div> <div> <div>0 0             </div> <div>3'-CGGUCCCUUCUC CGUCACGUA-5'</div> </div> </div> <div>plantacyanin</div> <div>miR408</div> </div>  | [21]       |
|                             | <div> <div>2/20 6/20</div> <div> <div>5'-CCAAGGGAAGAGGCAGUGCAU-3'</div> <div> <div>0 0             </div> <div>3'-CGGUCCCUUCUCCGUCACGUA-5'</div> </div> </div> <div>plantacyanin</div> <div>miR408</div> </div>   | [16]       |
|                             | <div> <div>1/4</div> <div> <div>5'-CCAAGGGAAGAGGCAGUGCAU-3'</div> <div> <div>0 0             </div> <div>3'-CGGUCCCUUCUCCGUCACGUA-5'</div> </div> </div> <div>plantacyanin</div> <div>miR408</div> </div>         | [20]       |
|                             | <div> <div>1/4</div> <div> <div>5'-GCCAGGGUGGAGUCAGUGCUU-3'</div> <div> <div>      00   0     0 </div> <div>3'-CGGUCCCUUCUCCGUCACGUA-5'</div> </div> </div> <div>UCC2</div> <div>miR408</div> </div>              |            |

|                          |                                                                                                                                                                                                                                            |      |
|--------------------------|--------------------------------------------------------------------------------------------------------------------------------------------------------------------------------------------------------------------------------------------|------|
| <i>Oryza sativa</i>      | <div> <div>1/4 3/4</div> <div> <div>5'-ACCAGUGAAGAGGCUGUGCAG-3'</div> <div>LAC3</div> </div> <div> <div>0     0             0         0</div> <div>3'-CGGUCCC UUCUCCGUCACGUA-5'</div> <div>miR408</div> </div> </div>                      |      |
|                          | <div> <div>4/4</div> <div> <div>3'-GCCGGUGAAGAGGCUGUGCAA-5'</div> <div>LAC12</div> </div> <div> <div>    0 0             0         0</div> <div>5'-CGGUCCCUUC UCCGUCACGUA-3'</div> <div>miR408</div> </div> </div>                         |      |
|                          | <div> <div>3/4</div> <div> <div>3'-GCC GGUGAAGAGGCUGUGCAG-5'</div> <div>LAC13</div> </div> <div> <div>    0 0             0         0</div> <div>5'-CGGUCC CUUCUCCGUCAC GUA-3'</div> <div>miR408</div> </div> </div>                       |      |
|                          | <div> <div>1/10 2/10 6/10</div> <div> <div>5'-CCCAGGGAAGAGGCAGUGCAG-3'</div> <div>plantacyanin</div> </div> <div> <div>0                                    </div> <div>3'-CGGUCCCUUCUC CGUCACGUC-5'</div> <div>miR408</div> </div> </div> | [38] |
|                          | <div> <div>12/13</div> <div> <div>5'-C UCGGGGAAGAGGCAGUGCAA-3'</div> <div>UCL8</div> </div> <div> <div>00 0                                </div> <div>3'-CGGUCCCUUCUCCGUCACGUC-5'</div> <div>miR408</div> </div> </div>                   | [26] |
|                          | <div> <div>12/13</div> <div> <div>5'-GCCAGGAUAGAGGCAGUGCAU-3'</div> <div>PLC-like1</div> </div> <div> <div>        00                         0</div> <div>3'-CGGUCCCUUCU CCGUCACGUC-5'</div> <div>miR408</div> </div> </div>              | [20] |
|                          | <div> <div>6/6</div> <div> <div>5'-CCACCTGCCAGGATAGAGGC AGTGCATATGATT-3'</div> <div>UCL30</div> </div> <div> <div>        00    00                </div> <div>3'-CGGTCCT TCT CCG TCACGTC-5'</div> <div>miR408</div> </div> </div>          | [39] |
|                          | <div> <div>Cleavage site</div> <div> <div>5'-CGGUCCCUUCUCCGUCACGUC-3'</div> <div>DSHCT</div> </div> <div> <div>        0     0         0            </div> <div>3'-GCCAAGGACGAGGCGGUGCA-5'</div> <div>miR408</div> </div> </div>           | [40] |
|                          | <div> <div>1/6</div> <div> <div>5'-GCCGGUGAAGAGGCUGUGCAA-3'</div> <div>LAC3-like1</div> </div> <div> <div>    0 0                 0         0</div> <div>3'-CGGUCCCUUCUCCGUCACGUC-5'</div> <div>miR408</div> </div> </div>                 | [20] |
|                          | <div> <div>2/6 1/6</div> <div> <div>5'-GCUAGGCGAGAGGCAGUGCUU-3'</div> <div>UCC-like1</div> </div> <div> <div>   0     00                         0  </div> <div>3'-CGGUCCCU UCUCGUCACGUA-5'</div> <div>miR408</div> </div> </div>          | [20] |
| <i>Nicotiana tabacum</i> | <div> <div>3/6</div> <div> <div>5'-GUCAGGGAAGAAGCAGUGCAA-3'</div> <div>PLC-like1</div> </div> </div>                                                                                                                                       |      |

|                              |                                                                                                                                                                                                                                                                                                                                 |      |
|------------------------------|---------------------------------------------------------------------------------------------------------------------------------------------------------------------------------------------------------------------------------------------------------------------------------------------------------------------------------|------|
|                              | <div> <div> <div>0</div> <div>     </div> <div>0</div> <div>     </div> <div>0</div> </div> <div>3'-CGG UCCCUUC UCCGUCACGUA-5'</div> <div>miR408</div> </div>                                                                                                                                                                   |      |
|                              | <div> <div> <div>5/6</div> <div>↓</div> </div> <div>5'-ACCAGUGAAGAGGCUGUGCAU-3'</div> <div>LAC12-like1</div> </div> <div> <div> <div>0</div> <div>     </div> <div>0</div> <div>     </div> <div>0</div> <div>     </div> </div> <div>3'-CGGUCCCU UCUCGUCACGUA-5'</div> <div>miR408</div> </div>                                |      |
|                              | <div> <div> <div>6/28</div> <div>↓</div> </div> <div>5'-GCCGGGGTAGGCGGAGGGCAG-3'</div> <div>TaTOC-A1</div> </div> <div> <div> <div>     </div> <div>0</div> <div>     </div> <div>0</div> <div>00</div> <div>0</div> <div>     </div> </div> <div>3'-CGGUCCCUUCUCCGUCACGUC-5'</div> <div>miR408</div> </div>                    |      |
| <i>Triticum aestivum</i>     | <div> <div> <div>8/28</div> <div>↓</div> </div> <div>5'- G CCGGGGTGGGGGAGGGCAG-3'</div> <div>TaTOC-B1</div> </div> <div> <div> <div>     </div> <div>0</div> <div>     </div> <div>0</div> <div>0</div> <div>     </div> <div>0</div> </div> <div>3'-CGGUCCCUUCUCCGUCACGUC-5'</div> <div>miR408</div> </div>                    | [24] |
|                              | <div> <div> <div>14/28</div> <div>↓</div> </div> <div>5'-GCAGGGGCAGGGGCAGGGCAG-3'</div> <div>TaTOC-D1</div> </div> <div> <div> <div>     </div> <div>0</div> <div>0</div> <div>     </div> <div>0</div> <div>     </div> <div>0</div> <div>0</div> </div> <div>3'-CGGUCCCUU CUCCGUCACGUC-5'</div> <div>miR408</div> </div>      |      |
|                              | <div> <div> <div>9/13</div> <div>↓</div> </div> <div>5'- AAGCAACCCAGTGAAGAGGCTGTGCAAGACCC-3'</div> <div>LAC3</div> </div> <div> <div> <div>     </div> <div>0</div> <div>     </div> <div>0</div> <div>     </div> </div> <div>3'-TCGGTCCCTTCTCCGTCACGT-5'</div> <div>miR408</div> </div>                                       | [41] |
| <i>Salvia miltiorrhiza</i>   | <div> <div> <div>13/15</div> <div>↓</div> </div> <div>3'-CAATCAACACCAGTGAAGAGGCTGTGCAAACTC</div> <div>LAC18</div> </div> <div> <div> <div>     </div> <div>0</div> <div>     </div> <div>0</div> <div>     </div> </div> <div>3'-TCGGTCC CT TC TCCGTCACGT-5'</div> <div>miR408</div> </div>                                     |      |
|                              | <div> <div> <div>11/21</div> <div>↓</div> </div> <div>5'-GCCGCCAGGGAAGAGGCAGAGCAGG-3'</div> <div>IbKCS</div> </div> <div> <div> <div>0</div> <div>     </div> <div>     </div> <div>0</div> <div>     </div> </div> <div>3'-UCGGUCCCUUCUCCGUC ACGU-5'</div> <div>miR408</div> </div>                                            |      |
| <i>Ipomoea batatas</i>       | <div> <div> <div>7/7</div> <div>↓</div> </div> <div>5'-GUCGUGAGGGAAGAGGCAGUGCAGU-3'</div> <div>IbPCL</div> </div> <div> <div> <div>0</div> <div>0</div> <div>0</div> <div>     </div> <div>     </div> <div>     </div> </div> <div>3'-UCGGUCCCUUCUCCGUCACGU5'</div> <div>miR408</div> </div>                                   | [44] |
|                              | <div> <div> <div>17/20</div> <div>↓</div> </div> <div>5'-UCCGCCGGGAAGAGGCGGUGGAAU-3'</div> <div>IbGAUT</div> </div> <div> <div> <div>     </div> <div>0</div> <div>     </div> <div>     </div> <div>0</div> <div>     </div> </div> <div>3'-U CGGUCC CUUCUC CGUCACGU-5'</div> <div>miR408</div> </div>                         |      |
| <i>Saccharum officinarum</i> | <div> <div> <div>8(10)</div> <div>↓</div> </div> <div>5'-GCCGGUGAAGAGGCUGUGCA-3'</div> <div>Diphenol oxidase laccase</div> </div> <div> <div> <div>     </div> <div>0</div> <div>0</div> <div>     </div> <div>     </div> <div>0</div> <div>     </div> </div> <div>3'-CGGUCCCUUCU CCGUCACGU-5'</div> <div>miR408</div> </div> | [64] |
| <i>Medicago</i>              |                                                                                                                                                                                                                                                                                                                                 | [42] |

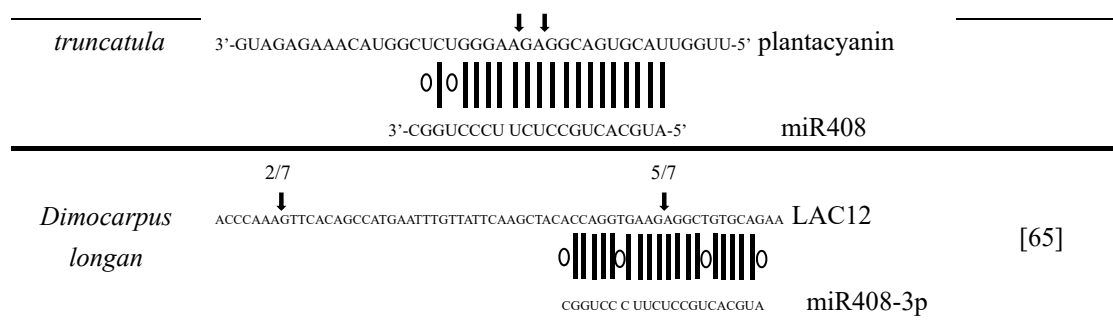

Vertical arrows indicate the 5' termini of miRNA-guided cleavage products, as identified by 5'-RACE, with the frequency of clones shown. Perfect base pairing is shown as vertical dashes, whereas G:U wobble pairing is indicated by circles. PLC, plantacyanin, UCC, Uclacyanin, LAC, laccase, DSHCT, DOB1/SK12/helY-like DEAD-box Helicase, LOC\_Os11 g07500, IbKCS, 3-ketoacyl-CoA synthase 4; IbPCL, Plantacyanins; IbGAUT, galacturonosyltransferase 7-like, TaTOC1, Triticum aestivum TIMING OF CABEXPRESSION 1.
